# Supplementary material for: Catalytic cracking of CH3Cl on copper-based phases
Source: Royal Society of Chemistry journal article supplement (doi:10.1039/d1cy02226a), 2022-01-01
Supplement: d1cy02226a1.pdf [file d1cy02226a1.pdf]

## Catalytic cracking of CH<sub>3</sub>Cl on copper-based phases

Eugénie Blaser,<sup>a,\*</sup> Cécile Rosier,<sup>b</sup> Michel Huet,<sup>b</sup> Christophe Geantet,<sup>a</sup> Stéphane Loridant<sup>a,\*</sup>

### Author affiliations

*a) Univ Lyon, Université Claude Bernard-Lyon 1, CNRS, IRCELYON-UMR 5256, 2 av. A. Einstein, F-69626 Villeurbanne Cedex, France*

*b) Elkem Silicones, 9 rue Specia, 69190 Saint Fons, France*

*\* Corresponding authors*

**Table S1:** Hypothetical reactions of CuCl formation from Cu.

| Reaction                                                                                                                             | $\Delta_r G^\circ(400\text{ }^\circ\text{C})$ (kJ/mol) |
|--------------------------------------------------------------------------------------------------------------------------------------|--------------------------------------------------------|
| $\text{CH}_3\text{Cl} + \text{Cu} \rightarrow \text{CuCl} + \frac{1}{4} \text{C} + \frac{3}{4} \text{CH}_4$                          | -78.9                                                  |
| $2 \text{CH}_3\text{Cl} + \text{Cu} \rightarrow \text{CuCl} + 2 \text{C} + \text{HCl} + \frac{5}{2} \text{H}_2$                      | -259.0                                                 |
| $\text{CH}_3\text{Cl} + \text{Cu} \rightarrow \text{CuCl} + \frac{1}{2} \text{C} + \frac{1}{2} \text{CH}_4 + \frac{1}{2} \text{H}_2$ | -81.8                                                  |

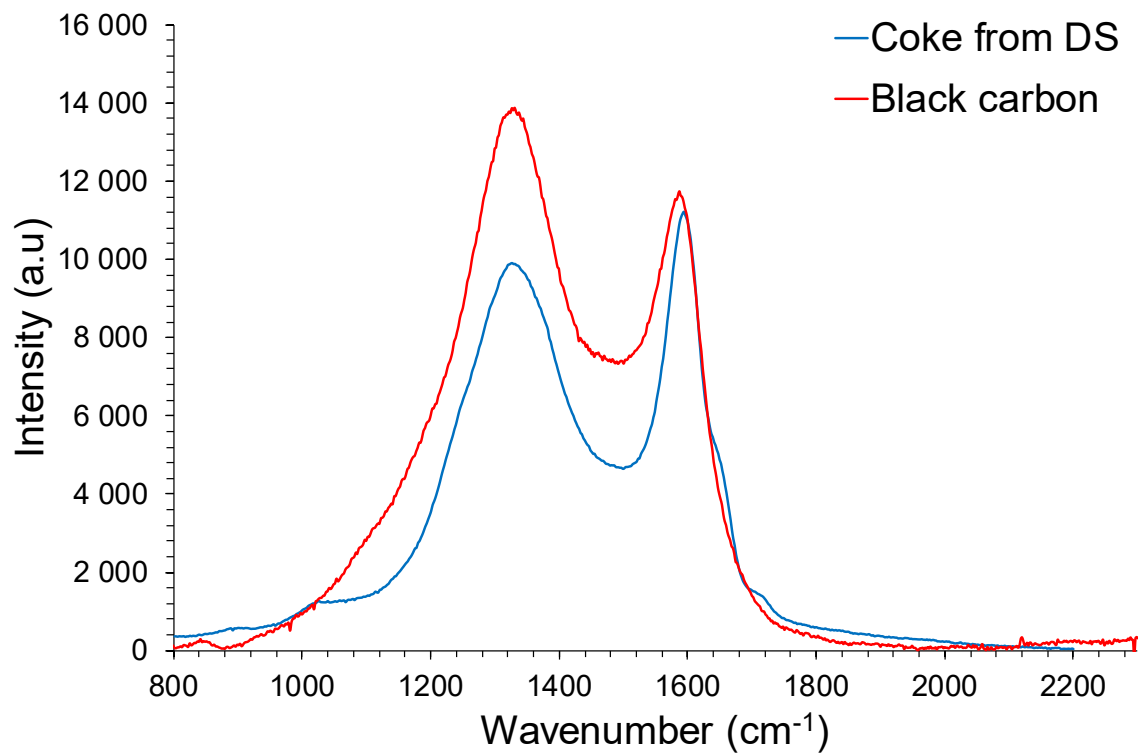

**Figure S1** Raman spectra of coke formed during the direct synthesis and the carbon black support-Vulcan 3. The D and G bands located around 1350 and 1575 cm<sup>-1</sup>, respectively are typical of disordered graphite.

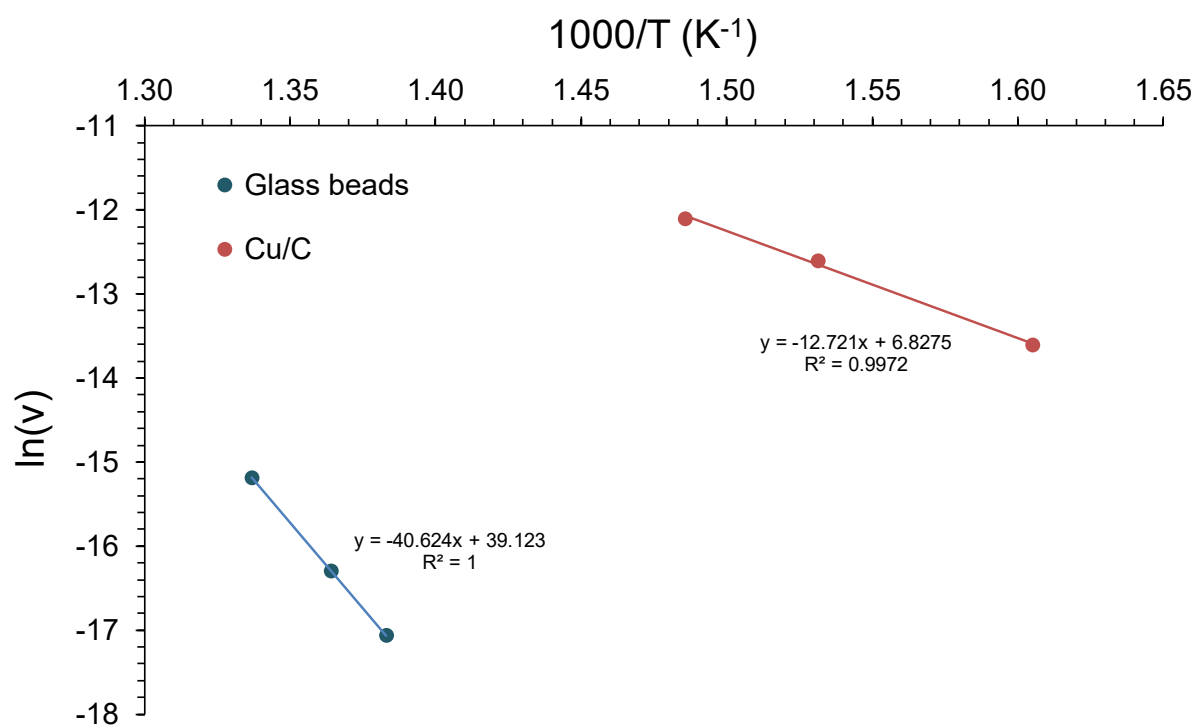

**Figure S2** Plot of  $\ln(v)$  as function of  $1/T$  for  $\text{CH}_3\text{Cl}$  cracking on inert surface (glass beads) and Cu/C.

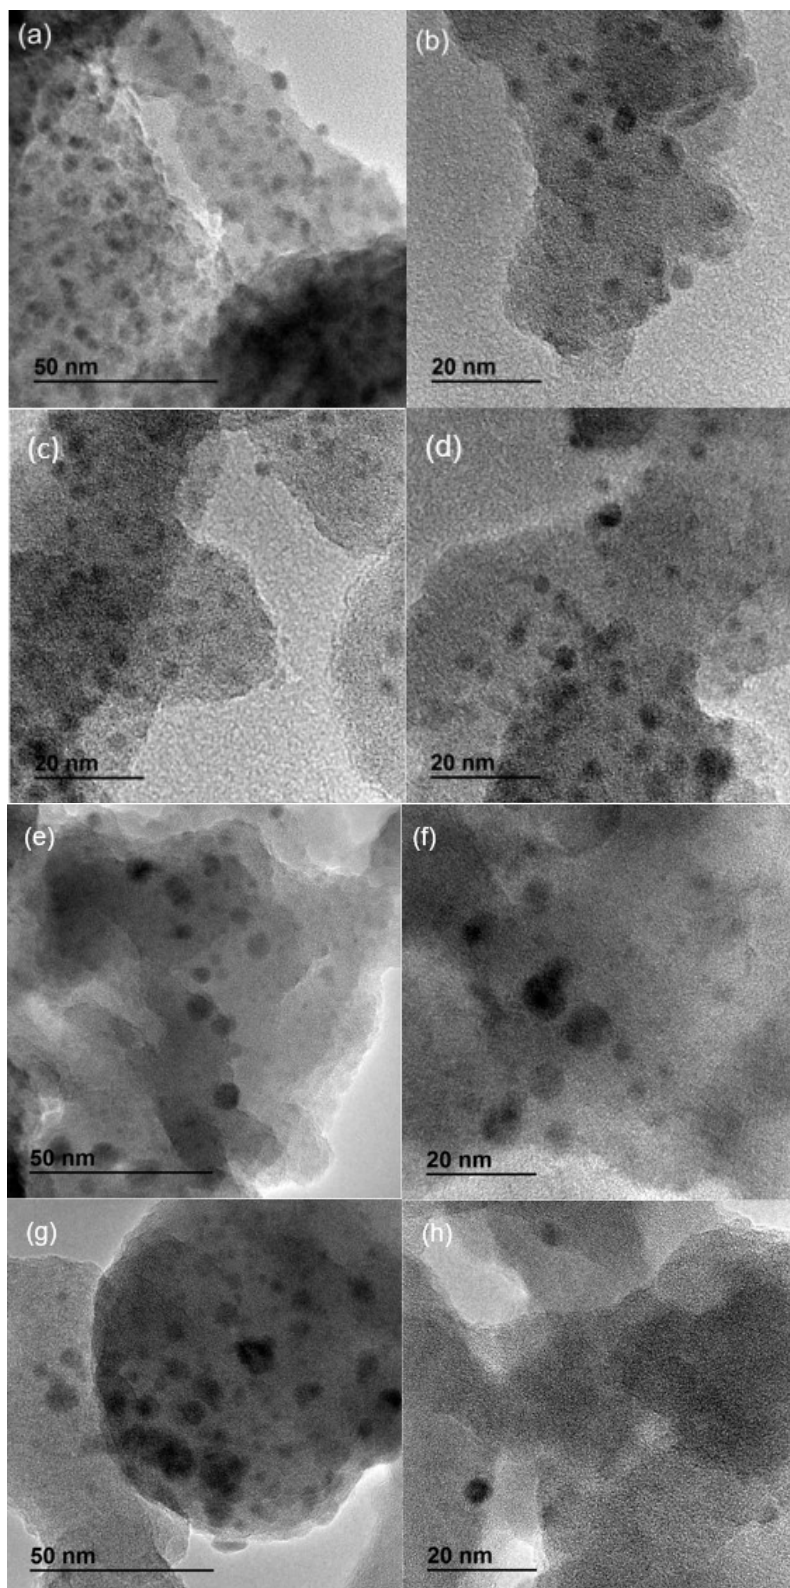

**Figure S3:** TEM images of Cu-nano/SiO<sub>2</sub> (a,b,c,d) before and (e,f,g,h) after the CH<sub>3</sub>Cl cracking.
